# Supplementary material
Source: Research Square preprint supplement (doi:10.21203/rs.3.rs-8763716/v1)
Supplement: Supplementary file 1 [file 4a23f29a56000892430c8510.docx]

| **Supplemental Table 1.** Full patient characteristics. | | | | | | | | | | |
| --- | --- | --- | --- | --- | --- | --- | --- | --- | --- | --- |
| **Patient number** | **Age** | **Sex** | **Glioma subtype and grade** | **Previous treatment** | **Time since last radiotherapy fraction (months)** | **EARL1 outcomes** | **EARL2 outcomes** | **BSREM150 outcomes** | **Follow-up outcome** | **Follow-up time (months)** |
| 1 | 59 | F | OD, grade 3 | S, RTx, CTx | 18 | TBRmax: 1.80 BTV: 1.44 mL TRC | TBRmax: 2.24 BTV: 3.28 mL PD | TBRmax: 2.54 BTV: 3.81 mL PD | PD | 13, ✝ |
| 2 | 37 | M | A, grade 2 | S, RTx, CTx | 34 | TBRmax: 6.89 BTV: 29.61 mL PD | TBRmax: 7.95 BTV: 26.56 mL PD | TBRmax: 8.04 BTV: 21.43 mL PD | PD | 4, ✝ |
| 3 | 28 | F | OD, grade 2 | S, RTx, CTx | 53 | TBRmax: 3.04 BTV: 11.10 mL PD | TBRmax: 3.66 BTV: 11.79 mL PD | TBRmax: 5.12 BTV: 10.95 mL PD | PD + | 41 |
| 4 | 55 | F | OD, grade 2 | S, RTx, CTx | 21 | TBRmax: 1.47 BTV: 0 mL TRC | TBRmax: 1.45 BTV: 0 mL TRC | TBRmax: 1.87 BTV: 0.05 mL TRC | TRC | 39 |
| 5 | 28 | M | A, grade 4 | S, RTx, CTx | 72 | TBRmax: 3.01 BTV: 12.24 mL PD | TBRmax: 3.35 BTV: 12.37 mL PD | TBRmax: 3.84 BTV: 11.24 mL PD | PD + | 39 |
| 6 | 40 | M | A, grade 4 | S, RTx, CTx | 13 | TBRmax: 1.54 BTV: 0 mL TRC | TBRmax: 1.79 BTV: 0.54 mL TRC | TBRmax: 2.32 BTV: 1.42 mL PD | TRC | 39 |
| 7 | 29 | F | A, grade 3 | S, RTx, CTx | 20 | TBRmax: 2.32 BTV: 13.95 mL PD | TBRmax: 2.65 BTV: 15.17 mL PD | TBRmax: 3.38 BTV: 15.34 mL PD | PD + | 9, ✝ |
| 8 | 48 | M | OD, grade 2 | S, RTx | 33 | TBRmax: 2.75 BTV: 2.75 mL PD | TBRmax: 3.86 BTV: 3.39 mL PD | TBRmax: 4.84 BTV: 3.55 mL PD | PD + | 38 |
| 9 | 29 | M | A, grade 3 | S, RTx, CTx | 89 | TBRmax: 3.35 BTV: 30.30 mL PD | TBRmax: 4.01 BTV: 26.92 mL PD | TBRmax: 5.00 BTV: 24.41 mL PD | PD + | 37 |
| 10 | 57 | M | A, grade 2 | S, RTx, CTx | 86 | TBRmax: 6.39 BTV: 101.56 mL PD | TBRmax: 7.37 BTV: 94.31 mL PD | TBRmax: 6.93 BTV: 93.74 mL PD | PD + | 11, ✝ |
| 11 | 27 | M | OD, grade 3 | S, RTx, CTx | 34 | TBRmax: 1.96 BTV: 0.53 mL Borderline | TBRmax: 2.84 BTV: 1.27 mL PD | TBRmax: 2.68 BTV: 1.61 mL PD | PD | 35 |
| 12 | 68 | M | OD, grade 2 | S, RTx, CTx | 82 | TBRmax: 4.57 BTV: 5.57 mL PD | TBRmax: 5.24 BTV: 5.40 mL PD | TBRmax: 7.42 BTV: 4.84 mL PD | PD | 35 |
| 13 | 73 | M | OD, grade 3 | S, RTx, CTx | 19 | TBRmax: 3.11 BTV: 52.06 mL PD | TBRmax: 3.56 BTV: 57.34 mL PD | TBRmax: 3.34 BTV: 61.54 mL PD | PD | 5, ✝ |
| 14 | 61 | M | OD, grade 2 | S, RTx, CTx | 28 | TBRmax: 4.09 BTV: 81.37 mL PD | TBRmax: 4.44 BTV: 84.52 mL PD | TBRmax: 5.02 BTV: 83.71 PD | PD | 7, ✝ |
| 15 | 73 | M | OD, grade 3 | S, RTx, CTx | 32 | TBRmax: 3.29 BTV: 11.21 mL PD | TBRmax: 3.60 BTV: 12.11 mL PD | TBRmax: 4.34 BTV: 14.63 mL PD | PD | 8, ✝ |
| 16 | 41 | F | A, grade 2 | S, RTx, S, CTx | 96 | TBRmax: 2.43 BTV: 4.26 mL PD | TBRmax: 2.93 BTV: 5.19 mL PD | TBRmax: 3.31 BTV: 5.36 mL PD | PD | 25 |
| 17 | 37 | M | A, grade 4 | S, RTx, CTx | 11 | TBRmax: 2.01 BTV: 4.30 mL Borderline | TBRmax: 2.20 BTV: 6.76 mL Borderline | TBRmax: 2.67 BTV: 13.00 mL PD | PD | 29 |
| 18 | 59 | F | OD, grade 3 | S, RTx | 171 | TBRmax: 1.17 BTV: 0 mL TRC | TBRmax: 1.29 BTV: 0 mL TRC | TBRmax: 1.53 BTV: 0 mL TRC | TRC | 29 |
| 19 | 46 | M | OD, grade 2 | S, RTx, CTx | 14 | TBRmax: 2.30 BTV: 3.21 mL Borderline | TBRmax: 2.87 BTV: 5.03 mL PD | TBRmax: 3.76 BTV: 20.10 mL PD | PD | 28 |
| 20 | 50 | M | GBM, grade 4 | S, RTx, CTx, RTx | 6 | TBRmax: 3.31 BTV: 25.08 mL PD | TBRmax: 3.83 BTV: 24.11 mL PD | TBRmax: 4.49 BTV: 23.91 mL PD | PD | 4, ✝ |
| 21 | 43 | F | A, grade 2 | S, RTx, CTx | 32 | TBRmax: 2.38 BTV: 2.07 mL PD | TBRmax: 3.24 BTV: 2.80 mL PD | TBRmax: 3.98  BTV: 2.84 mL PD | PD | 27 |
| 22 | 37 | F | A, grade 3 | S, RTx, CTx | 48 | TBRmax: 2.22 BTV: 40.55 mL Borderline | TBRmax: 2.16 BTV: 43.08 mL Borderline | TBRmax: 3.23 BTV: 49.41 mL PD | PD | 24 |
| 23 | 52 | M | OD, grade 2 | RTx, CTx | 187 | TBRmax: 4.26 BTV: 220.25 mL PD | TBRmax: 4.93 BTV: 205.24 mL PD | TBRmax: 6.88 BTV: 195.86 mL PD | PD | 23 |
| 24 | 41 | F | A, grade 3 | S, RTx, CTx | 59 | TBRmax: 1.99 BTV: 6.25 mL Borderline | TBRmax: 2.24 BTV: 7.34 mL Borderline | TBRmax: 2.65 BTV: 8.05 mL PD | PD | 20 |
| 25 | 54 | M | OD, grade 3 | S, RTx, CTx | 178 | TBRmax: 3.21 BTV: 5.72 mL PD | TBRmax: 4.01 BTV: 5.81 mL PD | TBRmax: 5.19 BTV: 5.01 mL PD | PD | 19 |
| 26 | 41 | M | A, grade 2 | S, RTx, CTx | 41 | TBRmax: 3.42 BTV: 19.87 mL PD | TBRmax: 4.28 BTV: 19.62 mL PD | TBRmax: 5.47 BTV: 18.63mL PD | PD | 12 |
| 27 | 40 | F | OD, grade 2 | S, RTx, CTx | 17 | TBRmax: 1.24 BTV: 0 mL TRC | TBRmax: 1.46 BTV: 0 mL TRC | TBRmax: 1.57 BTV: 0 mL TRC | TRC | 16 |
| 28 | 54 | F | OD, grade 2 | S, RTx, CTx | 96 | TBRmax: 1.22 BTV: 0 mL TRC | TBRmax: 1.35 BTV: 0 mL TRC | TBRmax: 1.61 BTV: 0 mL TRC | TRC | 16 |
| 29 | 55 | M | OD, grade 2 | S, RTx, CTx | 85 | TBRmax: 2.16 BTV: 9.53 mL Borderline | TBRmax: 2.45 BTV: 10.32 mL PD | TBRmax: 2.95 BTV: 11.63 mL PD | PD | 14 |
| 30 | 54 | M | A, grade 4 | S, RTx, CTx, RTx | 46 | TBRmax: 1.59 BTV: 0 mL TRC | TBRmax: 2.07 BTV: 3.07 Borderline | TBRmax: 2.60 BTV: 6.09 PD | PD | 14 |
| 131 | 74 | M | A, grade 4 | S, RTx, CTx | 64 | TBRmax: 3.26 BTV: 27.70 mL PD | TBRmax: 3.74 BTV: 26.30 mL PD | TBRmax: 4.69 BTV: 25.16 mL PD | PD | 13 |
| 32 | 66 | M | GBM, grade 4 | S, RTx, CTx | 4 | TBRmax: 2.96 BTV: 14.89 mL PD | TBRmax: 3.34 BTV: 14.00 mL PD | TBRmax: 4.21 BTV: 13. 26 mL PD | PD + TRC | 11 |
| 33 | 43 | M | OD, grade 3 | S, RTx, CTx | 32 | TBRmax: 1.64 BTV: 0.01 mL TRC | TBRmax: 2.08 BTV: 0.39 mL Borderline | TBRmax: 2.72 BTV: 0.64 mL PD | PD | 10 |

Color-coded lesion classification: green indicates treatment-related changes, orange indicates borderline findings on [¹⁸F]FET PET, and red indicates progressive disease.

F = female; M = male; OD = oligodendroglioma; A = astrocytoma; GBM = glioblastoma; S = surgery; RTx = radiotherapy; CTx = chemotherapy.

* Started therapy per patient explicit wishes
+ Histopathological confirmation
✝ Deceased

**Supplemental Table 2.** Lesion-based analysis of measurable disease, FET-positivity, and classification across reconstructions.

|  | **EARL1** | **EARL2** | **BSREM** | p-value |
| --- | --- | --- | --- | --- |
| **Measurable disease, n (%)** |  |  |  | <0.001 |
| BTV > 0.5 mL | 32 (68%)** | 40 (85%)* | 42 (89%)* |  |
| BTV < 0.5 mL | 15 (32%)** | 7 (15%)* | 5 (11%)* |  |
| **FET-positive lesion, n (%)** |  |  |  | 0.015 |
| SUVmean > 1.6 | 39 (83%)* | 43 (91%) | 44 (94%)* |  |
| SUVmean < 1.6 | 8 (17%)* | 4 (9%) | 3 (6%)* |  |
| **Lesion classification, n (%)** |  |  |  | <0.001 |
| TRC | 16 (34%)** | 8 (17%)* | 4 (9%)* |  |
| Borderline | 8 (17%) | 9 (19%) | 2 (4%) |  |
| PD | 23 (49%)* | 30 (64%)* | 41 (87%)** |  |

* Significant difference at p <.05 between pairs (Dunn-Bonferroni corrected post-hoc test after Cochran’s Q test).

**Supplemental Table 3.** Patient-level classification of progressive disease (PD) versus treatment-related changes (TRC) compared to follow-up outcomes.
(A)

|  | Follow-up outcome | |  |
| --- | --- | --- | --- |
| EARL1 | PD | TRC | Total |
| PD | 21 | 0 | 21 (64%) |
| TRC | 3 | 5 | 8 (24%) |
| Borderline | 4 | 0 | 4 (12%) |
| Total | 28 (85%) | 5 (15%) | 33 |

(B)

|  | Follow-up outcome | |  |
| --- | --- | --- | --- |
| EARL2 | PD | TRC | Total |
| PD | 24 | 0 | 24 (75%) |
| TRC | 0 | 5 | 5 (16%) |
| Borderline | 4 | 0 | 3 (9%) |
| Total | 28 (85%) | 5 (15%) | 33 |

(C)

|  | Follow-up outcome | |  |
| --- | --- | --- | --- |
| BSREM150 | PD | TRC | Total |
| PD | 28 | 1 | 29 (88%) |
| TRC | 0 | 4 | 4 (12%) |
| Borderline | 0 | 0 | 0 |
| Total | 28 (85%) | 5 (15%) | 33 |

**Supplemental Table 4.** Dice and Jaccard similarity coefficients for EARL2 and BSREM reconstructions relative to EARL1 at increasing TBR thresholds in a subset of 30 lesions in 21 patients. Values are shown as median (range).

| **Reconstruction** | **TBR threshold** | **DICE** | **Jaccard** |  |
| --- | --- | --- | --- | --- |
| EARL2 | 1.6 | 0.869 (0.110-0.955) | 0.769 (0.058-0.913) |  |
|  | 1.7 | 0.860 (0.136-0.947) | 0.754 (0.073-0.900) |  |
|  | 1.8 | 0.787 (0.170-0.951) | 0.649 (0.093-0.906) |  |
|  | 1.9 | 0.765 (0.223-0.885) | 0.619 (0.125-0.794) |  |
|  | 2.0 | 0.676 (0.082-1.00) | 0.513 (0.043-1.00) |  |
| BSREM | 1.6 | 0.722 (0.067-0.888) | 0.566 (0.034-0.798) |  |
|  | 1.7 | 0.754 (0.072-0.908) | 0.605 (0.037-0.832) |  |
|  | 1.8 | 0.753 (0.087-0.909) | 0.603 (0.045-0.833) |  |
|  | 1.9 | 0.728 (0.087-0.909) | 0.572 (0.045-0.833) |  |
|  | 2.0 | 0.701 (0.098-0.860) | 0.540 (0.051-0.754) |  |
